# Supplementary material
Source: PubMed Central journal article supplement (PMC10716342)
Supplement: mmc1.pdf [file mmc1.pdf]

**The American Journal of Human Genetics, Volume 110**

**Supplemental information**

**Efficient *in vivo* prime editing corrects the most  
frequent phenylketonuria variant, associated  
with high unmet medical need**

**Dominique L. Brooks, Madelynn N. Whittaker, Ping Qu, Kiran Musunuru, Rebecca C. Ahrens-Nicklas, and Xiao Wang**

**Figure S1. Scheme for Generation of Humanized R408W Mice.**

**Wildtype Locus of the Murine Pah Gene (standard project)**

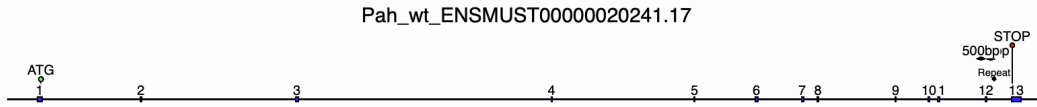

blue boxes: murine exons

**Wildtype Locus of the Human Pah Gene (standard project)**

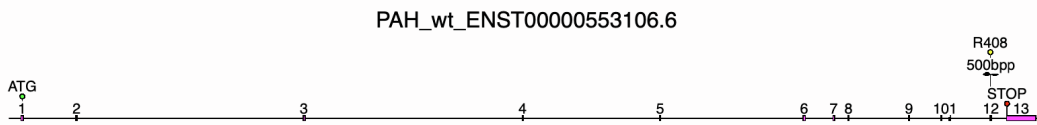

pink boxes: human exons

**Gene Targeted Locus of the Pah Gene (standard project)**

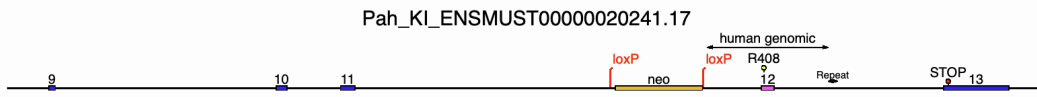

blue boxes: mouse exons; pink boxes: human exons; neo: neomycin cassette for selection in ES cells; loxP: recognition sequence for cre recombinase mediated neo removal

**Gene Targeted Locus after cre mediated neo removal (included in project)**

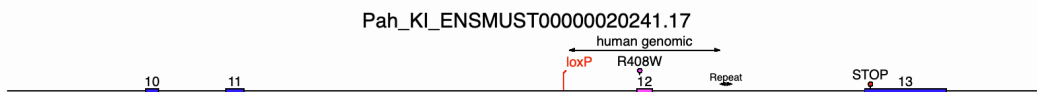

### Figure S2. Phenylketonuria Phenotypes in Humanized R408W Mice.

(A) Homozygous R408W mouse with PKU as evidenced by hypopigmentation of the fur, on left, compared to heterozygous R408W non-PKU littermate, on right.

(B) Blood phenylalanine levels and weights of homozygous R408W PKU ( $n = 8$  animals) and heterozygous R408W non-PKU ( $n = 6$  animals) age-matched (6 weeks of age) colony-mates. Lines = mean values.  $P$  values calculated with Mann-Whitney  $U$  test.

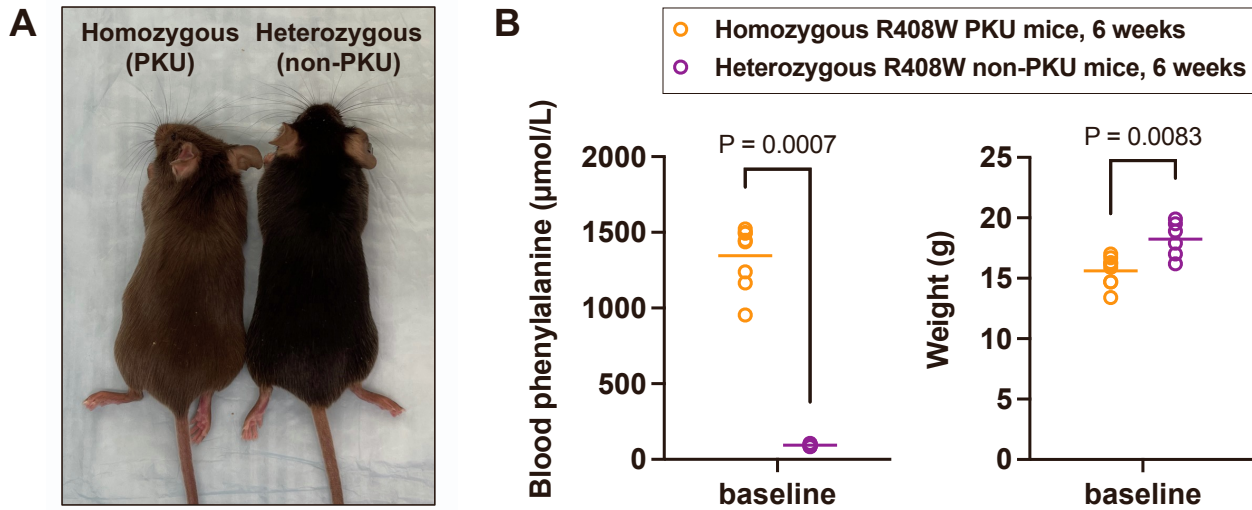

**Figure S3. Scheme for Generation of Humanized 1066 Mice.**

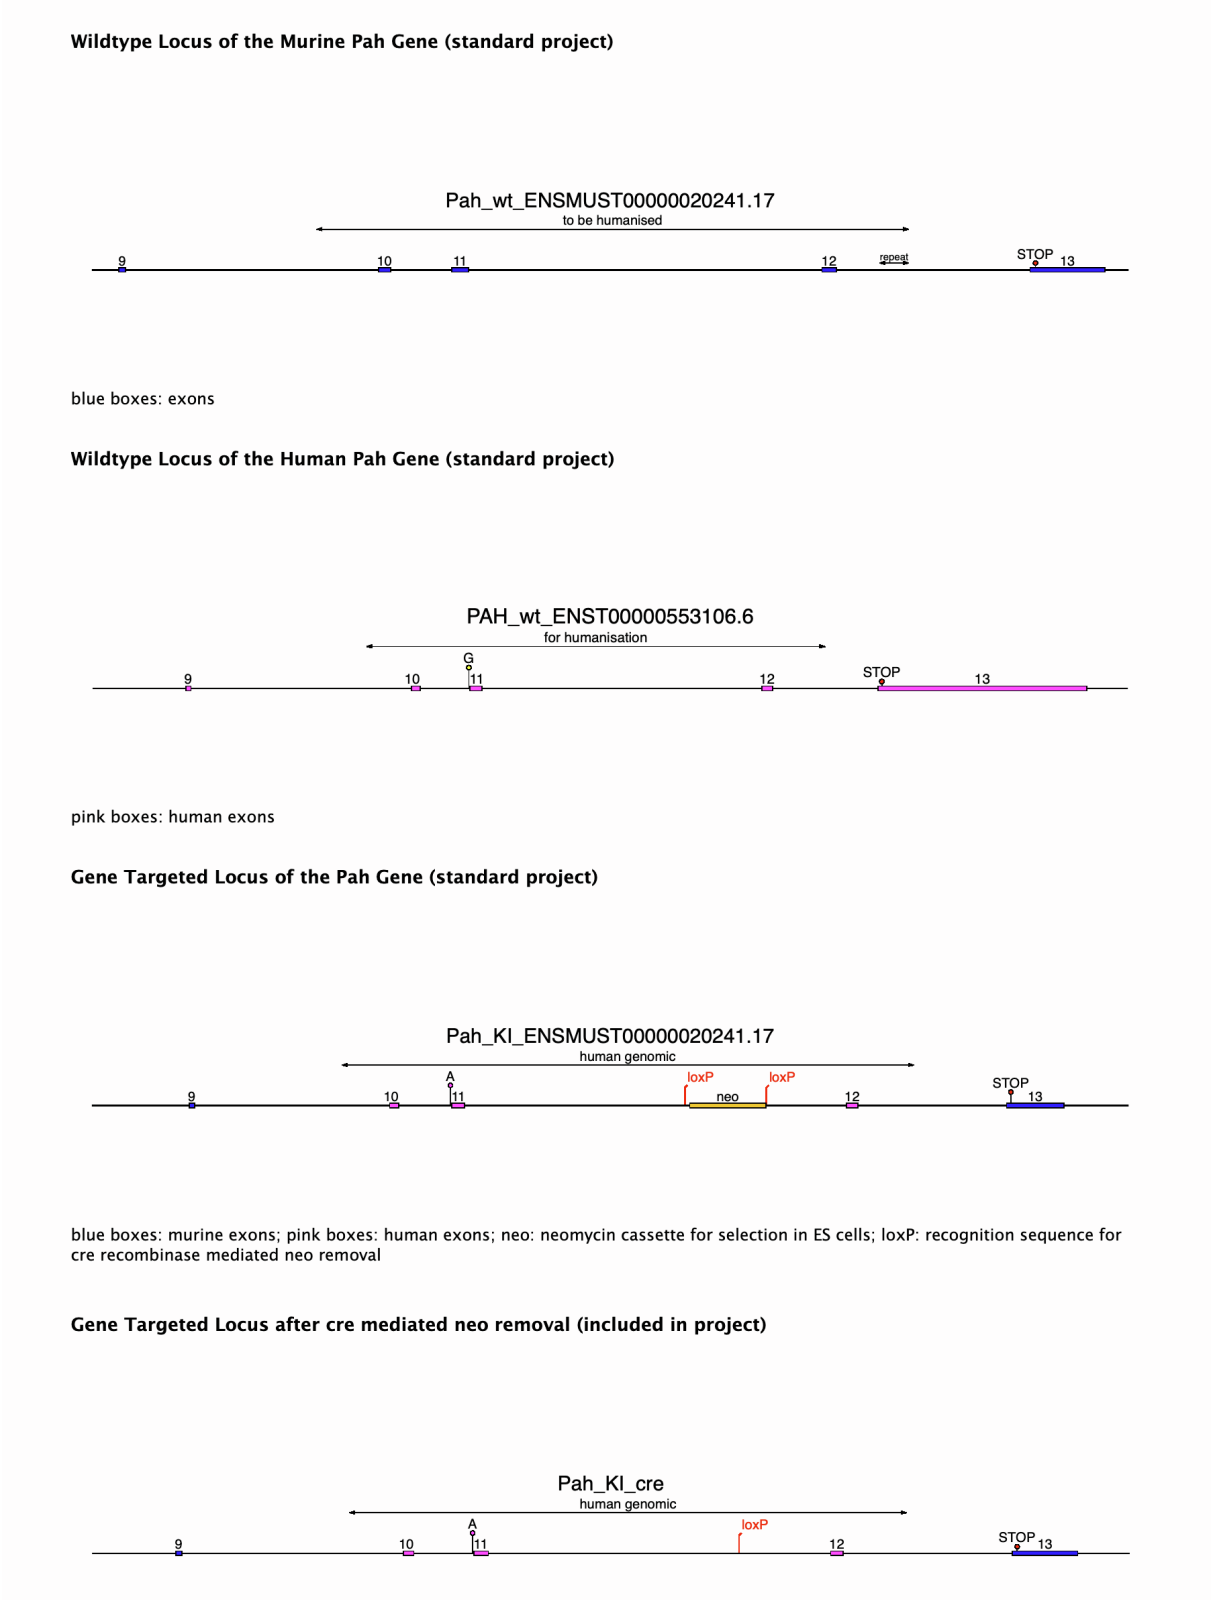

### Figure S4. Schematic of Dual-AAV Prime Editing System.

PE3 = prime editor 3; AAV = adeno-associated virus; SpPE2 max = *Streptococcus pyogenes* prime editor 2 max; ITR = inverted terminal repeat; Cbh promoter = chicken  $\beta$ -actin promoter with cytomegalovirus early enhancer element; SpCas9max = *Streptococcus pyogenes* Cas9 max; Npu-N = *Nostoc punctiforme* N-terminal split intein; Npu-C = *Nostoc punctiforme* C-terminal split intein; MMLV = Moloney murine leukemia virus; RT = reverse transcriptase; RNaseH = ribonuclease H; SV40 = simian virus 40; pA = polyadenylation signal; mU6 = mouse U6 promoter; sgRNA = single guide RNA; hU6 = human U6 promoter; epegRNA = engineered prime editing guide RNA. This figure was reproduced without changes from reference 16 [Davis, J.R., Banskota, S., Levy, J.M., Newby, G.A., Wang, X., Anzalone, A.V., Nelson, A.T., Chen, P.J., Hennes, A.D., An, M., et al. (2023). Efficient prime editing in mouse brain, liver and heart with dual AAVs. *Nat. Biotechnol.* 10.1038/s41587-023-01758-z] in accordance with the terms of the Creative Commons Attribution 4.0 International License: <https://creativecommons.org/licenses/by/4.0/>.

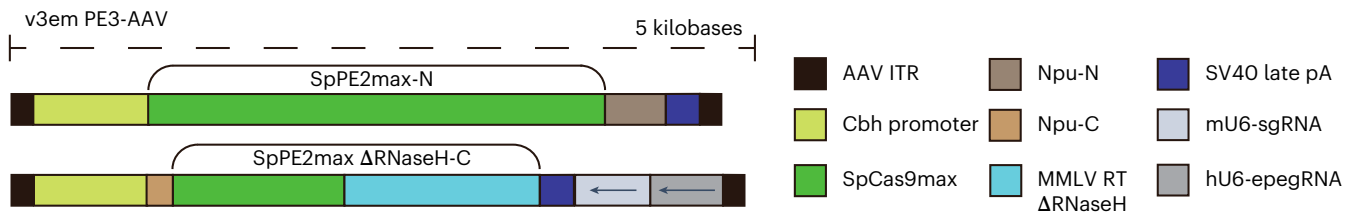

**Figure S5. Liver Function Tests in Treated PKU and Control Non-PKU Groups of Mice, Related to Figure 5.**

(A) Blood aspartate aminotransferase (AST) levels and alanine aminotransferase (ALT) levels in homozygous PKU mice following treatment with  $8 \times 10^{11}$  vg AAV dose ( $n = 4$  animals) or with  $4 \times 10^{11}$  vg AAV dose ( $n = 3$  animals), comparing levels at various timepoints up to 5 weeks following treatment to levels in untreated heterozygous non-PKU control ( $n = 3$  animals) age-matched (6 weeks of age) colonymates (1 blood sample per timepoint).

(B) AST levels and ALT levels in homozygous PKU mice following treatment with  $8 \times 10^{11}$  vg AAV dose ( $n = 3$  animals), comparing levels at various timepoints up to 5 weeks following treatment to levels in untreated heterozygous non-PKU control ( $n = 2$  animals) age-matched (10 weeks of age) colonymates (1 blood sample per timepoint).

(C) AST levels and ALT levels in compound heterozygous PKU mice following treatment with  $1 \times 10^{12}$  vg AAV dose ( $n = 3$  animals), comparing levels at various timepoints up to 5 weeks following treatment to levels in untreated heterozygous non-PKU control ( $n = 2$  animals) age-matched (6 weeks of age) colonymates (1 blood sample per timepoint).  
Lines in graphs = mean values.

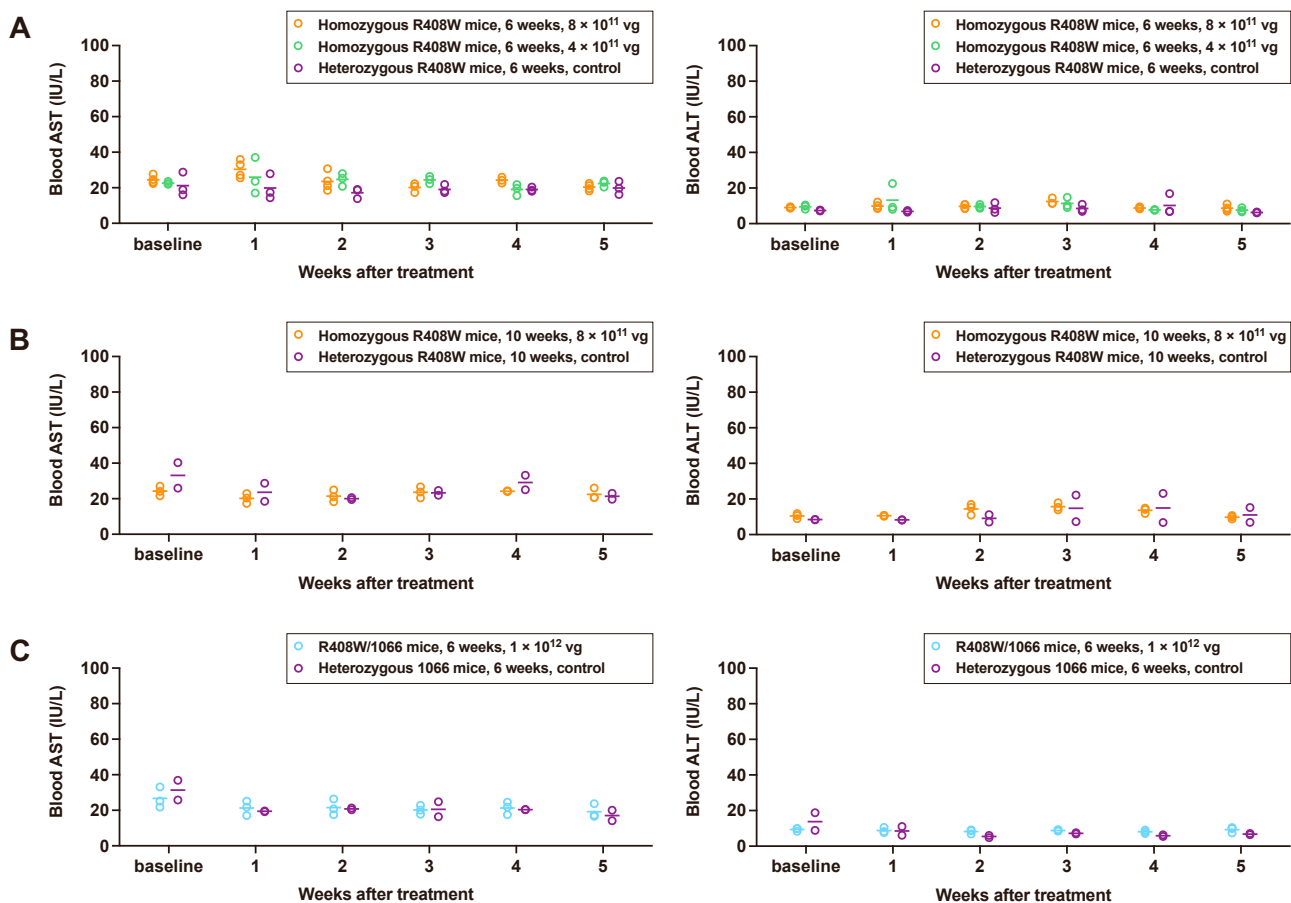



|     |                                                                                                                                                                                                                |
|-----|----------------------------------------------------------------------------------------------------------------------------------------------------------------------------------------------------------------|
| P40 | <b>ACUUUGCUGCCACAAUACCUGUUUGAGAGCUAUGCUGGAAACAGCAUAGCAAGUUCAAAUAAGGCUAGUCCGUUAUCAACUUGAAAAAGUGGCACCGAGUCGGUGC</b><br><b>CUGAGAAGGGu</b> <b>CggGGUAUUGUGGCA</b> <b>CGCGGUUCUAUCUAGUUACGCGUUAACCAACUAGAA</b>     |
| P41 | <b>ACUUUGCUGCCACAAUACCUGUUUGAGAGCUAUGCUGGAAACAGCAUAGCAAGUUCAAAUAAGGCUAGUCCGUUAUCAACUUGAAAAAGUGGCACCGAGUCGGUGC</b><br><b>ACUGAGAAGGGu</b> <b>CggGGUAUUGUGGCA</b> <b>CGCGGUUCUAUCUAGUUACGCGUUAACCAACUAGAA</b>    |
| P42 | <b>ACUUUGCUGCCACAAUACCUGUUUGAGAGCUAUGCUGGAAACAGCAUAGCAAGUUCAAAUAAGGCUAGUCCGUUAUCAACUUGAAAAAGUGGCACCGAGUCGGUGC</b><br><b>AACUGAGAAGGGu</b> <b>CggGGUAUUGUGGCA</b> <b>CGCGGUUCUAUCUAGUUACGCGUUAACCAACUAGAA</b>   |
| P43 | <b>ACUUUGCUGCCACAAUACCUGUUUGAGAGCUAUGCUGGAAACAGCAUAGCAAGUUCAAAUAAGGCUAGUCCGUUAUCAACUUGAAAAAGUGGCACCGAGUCGGUGC</b><br><b>GAAUCUGAGAAGGGu</b> <b>CggGGUAUUGUGGCA</b> <b>CGCGGUUCUAUCUAGUUACGCGUUAACCAACUAGAA</b> |
| P44 | <b>ACUUUGCUGCCACAAUACCUGUUUGAGAGCUAUGCUGGAAACAGCAUAGCAAGUUCAAAUAAGGCUAGUCCGUUAUCAACUUGAAAAAGUGGCACCGAGUCGGUGC</b><br><b>CGAACUGAGAAGGGu</b> <b>CggGGUAUUGUGGCA</b> <b>CGCGGUUCUAUCUAGUUACGCGUUAACCAACUAGAA</b> |
| P45 | <b>ACUUUGCUGCCACAAUACCUGUUUGAGAGCUAUGCUGGAAACAGCAUAGCAAGUUCAAAUAAGGCUAGUCCGUUAUCAACUUGAAAAAGUGGCACCGAGUCGGUGC</b><br><b>ACUGAGAAaGGu</b> <b>CggGGUAUUGUGGCA</b> <b>CGCGGUUCUAUCUAGUUACGCGUUAACCAACUAGAA</b>    |
| P46 | <b>ACUUUGCUGCCACAAUACCUGUUUGAGAGCUAUGCUGGAAACAGCAUAGCAAGUUCAAAUAAGGCUAGUCCGUUAUCAACUUGAAAAAGUGGCACCGAGUCGGUGC</b><br><b>AACUGAGAAaGGu</b> <b>CggGGUAUUGUGGCA</b> <b>CGCGGUUCUAUCUAGUUACGCGUUAACCAACUAGAA</b>   |
| P47 | <b>ACUUUGCUGCCACAAUACCUGUUUGAGAGCUAUGCUGGAAACAGCAUAGCAAGUUCAAAUAAGGCUAGUCCGUUAUCAACUUGAAAAAGUGGCACCGAGUCGGUGC</b><br><b>GAAUCUGAGAaGGu</b> <b>CggGGUAUUGUGGCA</b> <b>CGCGGUUCUAUCUAGUUACGCGUUAACCAACUAGAA</b>  |
| P48 | <b>ACUUUGCUGCCACAAUACCUGUUUGAGAGCUAUGCUGGAAACAGCAUAGCAAGUUCAAAUAAGGCUAGUCCGUUAUCAACUUGAAAAAGUGGCACCGAGUCGGUGC</b><br><b>CGAACUGAGAAaGGu</b> <b>CggGGUAUUGUGGCA</b> <b>CGCGGUUCUAUCUAGUUACGCGUUAACCAACUAGAA</b> |
| P49 | <b>ACUUUGCUGCCACAAUACCUGUUUGAGAGCUAUGCUGGAAACAGCAUAGCAAGUUCAAAUAAGGCUAGUCCGUUAUCAACUUGAAAAAGUGGCACCGAGUCGGUGC</b><br><b>GAGAAGGGu</b> <b>CgcGGUAUUGUGGCA</b> <b>CGCGGUUCUAUCUAGUUACGCGUUAACCAACUAGAA</b>       |
| P50 | <b>ACUUUGCUGCCACAAUACCUGUUUGAGAGCUAUGCUGGAAACAGCAUAGCAAGUUCAAAUAAGGCUAGUCCGUUAUCAACUUGAAAAAGUGGCACCGAGUCGGUGC</b><br><b>GAGAAGGGu</b> <b>CguGGUAUUGUGGCA</b> <b>CGCGGUUCUAUCUAGUUACGCGUUAACCAACUAGAA</b>       |
| P51 | <b>ACUUUGCUGCCACAAUACCUGUUUGAGAGCUAUGCUGGAAACAGCAUAGCAAGUUCAAAUAAGGCUAGUCCGUUAUCAACUUGAAAAAGUGGCACCGAGUCGGUGC</b><br><b>GAGAAGGGg</b> <b>CggGGUAUUGUGGCA</b> <b>CGCGGUUCUAUCUAGUUACGCGUUAACCAACUAGAA</b>       |
| P52 | <b>ACUUUGCUGCCACAAUACCUGUUUGAGAGCUAUGCUGGAAACAGCAUAGCAAGUUCAAAUAAGGCUAGUCCGUUAUCAACUUGAAAAAGUGGCACCGAGUCGGUGC</b><br><b>GAGAAGGGg</b> <b>CgcGGUAUUGUGGCA</b> <b>CGCGGUUCUAUCUAGUUACGCGUUAACCAACUAGAA</b>       |
| P53 | <b>ACUUUGCUGCCACAAUACCUGUUUGAGAGCUAUGCUGGAAACAGCAUAGCAAGUUCAAAUAAGGCUAGUCCGUUAUCAACUUGAAAAAGUGGCACCGAGUCGGUGC</b><br><b>GAGAAGGGg</b> <b>CguGGUAUUGUGGCA</b> <b>CGCGGUUCUAUCUAGUUACGCGUUAACCAACUAGAA</b>       |
| P54 | <b>ACUUUGCUGCCACAAUACCUGUUUGAGAGCUAUGCUGGAAACAGCAUAGCAAGUUCAAAUAAGGCUAGUCCGUUAUCAACUUGAAAAAGUGGCACCGAGUCGGUGC</b><br><b>GAGAAGGGa</b> <b>CggGGUAUUGUGGCA</b> <b>CGCGGUUCUAUCUAGUUACGCGUUAACCAACUAGAA</b>       |
| P55 | <b>ACUUUGCUGCCACAAUACCUGUUUGAGAGCUAUGCUGGAAACAGCAUAGCAAGUUCAAAUAAGGCUAGUCCGUUAUCAACUUGAAAAAGUGGCACCGAGUCGGUGC</b><br><b>GAGAAGGGa</b> <b>CgcGGUAUUGUGGCA</b> <b>CGCGGUUCUAUCUAGUUACGCGUUAACCAACUAGAA</b>       |
| P56 | <b>ACUUUGCUGCCACAAUACCUGUUUGAGAGCUAUGCUGGAAACAGCAUAGCAAGUUCAAAUAAGGCUAGUCCGUUAUCAACUUGAAAAAGUGGCACCGAGUCGGUGC</b><br><b>GAGAAGGGa</b> <b>CguGGUAUUGUGGCA</b> <b>CGCGGUUCUAUCUAGUUACGCGUUAACCAACUAGAA</b>       |

Black bold = spacer sequence; red bold = RTT; blue bold = PBS; lower case indicates nucleotide substitution to be introduced by RTT.



**Table S2. ngRNAs.**

|     |                                                                                                               |
|-----|---------------------------------------------------------------------------------------------------------------|
| N1  | <b>UGAGAAGGGCCaAGGUAUUG</b> GUUUUAGAGCUAGAAAUAGCAAGUUAUUAAAGGCUAGUCCGUUAUCAACUUGAAAAAGUGGCACCGAGUCGGUGCUUUU   |
| N2  | <b>UAGCGAACUCUGAGAAGGGCCa</b> GUUUUAGAGCUAGAAAUAGCAAGUUAUUAAAGGCUAGUCCGUUAUCAACUUGAAAAAGUGGCACCGAGUCGGUGCUUUU |
| N3  | <b>UGAGAAGGGCCgAGGUAUUG</b> GUUUUAGAGCUAGAAAUAGCAAGUUAUUAAAGGCUAGUCCGUUAUCAACUUGAAAAAGUGGCACCGAGUCGGUGCUUUU   |
| N4  | <b>UGAGAAGGGGuCgAGGUAUUG</b> GUUUUAGAGCUAGAAAUAGCAAGUUAUUAAAGGCUAGUCCGUUAUCAACUUGAAAAAGUGGCACCGAGUCGGUGCUUUU  |
| N5  | <b>UGAGAAGGGGuCggGGUAUUG</b> GUUUUAGAGCUAGAAAUAGCAAGUUAUUAAAGGCUAGUCCGUUAUCAACUUGAAAAAGUGGCACCGAGUCGGUGCUUUU  |
| N6  | <b>UGAGAAaGGuCgAGGUAUUG</b> GUUUUAGAGCUAGAAAUAGCAAGUUAUUAAAGGCUAGUCCGUUAUCAACUUGAAAAAGUGGCACCGAGUCGGUGCUUUU   |
| N7  | <b>UGAGAAaGGuCggGGUAUUG</b> GUUUUAGAGCUAGAAAUAGCAAGUUAUUAAAGGCUAGUCCGUUAUCAACUUGAAAAAGUGGCACCGAGUCGGUGCUUUU   |
| N8  | <b>ACUUUGCUGCCACAAUACC</b> GUUUUAGAGCUAGAAAUAGCAAGUUAUUAAAGGCUAGUCCGUUAUCAACUUGAAAAAGUGGCACCGAGUCGGUGCUUUU    |
| N9  | <b>ACUUUGCUGCCACAAUACCc</b> GUUUUAGAGCUAGAAAUAGCAAGUUAUUAAAGGCUAGUCCGUUAUCAACUUGAAAAAGUGGCACCGAGUCGGUGCUUUU   |
| N10 | <b>ACUUUGCUGCCACAAUgCCc</b> GUUUUAGAGCUAGAAAUAGCAAGUUAUUAAAGGCUAGUCCGUUAUCAACUUGAAAAAGUGGCACCGAGUCGGUGCUUUU   |
| N11 | <b>ACUUUGCUGCCACgAUgCCc</b> GUUUUAGAGCUAGAAAUAGCAAGUUAUUAAAGGCUAGUCCGUUAUCAACUUGAAAAAGUGGCACCGAGUCGGUGCUUUU   |
| N12 | <b>UGAGAAGGGGuCgcGGUAUUG</b> GUUUUAGAGCUAGAAAUAGCAAGUUAUUAAAGGCUAGUCCGUUAUCAACUUGAAAAAGUGGCACCGAGUCGGUGCUUUU  |
| N13 | <b>UGAGAAGGGGuCguGGUAUUG</b> GUUUUAGAGCUAGAAAUAGCAAGUUAUUAAAGGCUAGUCCGUUAUCAACUUGAAAAAGUGGCACCGAGUCGGUGCUUUU  |
| N14 | <b>UGAGAAGGGGgCggGGUAUUG</b> GUUUUAGAGCUAGAAAUAGCAAGUUAUUAAAGGCUAGUCCGUUAUCAACUUGAAAAAGUGGCACCGAGUCGGUGCUUUU  |
| N15 | <b>UGAGAAGGGGgCgcGGUAUUG</b> GUUUUAGAGCUAGAAAUAGCAAGUUAUUAAAGGCUAGUCCGUUAUCAACUUGAAAAAGUGGCACCGAGUCGGUGCUUUU  |
| N16 | <b>UGAGAAGGGGgCguGGUAUUG</b> GUUUUAGAGCUAGAAAUAGCAAGUUAUUAAAGGCUAGUCCGUUAUCAACUUGAAAAAGUGGCACCGAGUCGGUGCUUUU  |
| N17 | <b>UGAGAAGGGGaCggGGUAUUG</b> GUUUUAGAGCUAGAAAUAGCAAGUUAUUAAAGGCUAGUCCGUUAUCAACUUGAAAAAGUGGCACCGAGUCGGUGCUUUU  |
| N18 | <b>UGAGAAGGGGaCgcGGUAUUG</b> GUUUUAGAGCUAGAAAUAGCAAGUUAUUAAAGGCUAGUCCGUUAUCAACUUGAAAAAGUGGCACCGAGUCGGUGCUUUU  |
| N19 | <b>UGAGAAGGGGaCguGGUAUUG</b> GUUUUAGAGCUAGAAAUAGCAAGUUAUUAAAGGCUAGUCCGUUAUCAACUUGAAAAAGUGGCACCGAGUCGGUGCUUUU  |

Black bold = spacer sequence; lower case indicates position complementary to nucleotide substitution introduced by RTT.



**Table S4. Assessment of Off-target Editing in R408W Homozygous HuH-7 Cells.**

| Genomic site | Protospacer/PAM sequence <sup>a</sup> | Amplicon (chromosome: position range) <sup>b</sup> | Treated sample 1 <sup>c</sup> | Treated sample 2 | Treated sample 3 | Control sample 1 | Control sample 2 | Control sample 3 |
|--------------|---------------------------------------|----------------------------------------------------|-------------------------------|------------------|------------------|------------------|------------------|------------------|
| PAH          | ACTTTGCTGCCACAATACCTTGG               | chr12:102840439-102840600                          | 32.32                         | 29.99            | 32.40            |                  |                  |                  |
| OT1          | ttTaTGCTGCCA-AATACCTAGG               | chr8:78462251-78462495                             | 0.62                          | 0.47             | 0.48             | 0.55             | 0.60             | 0.57             |
| OT2          | AagcgtgTGCACAATACCTGGG                | chr2:13589808+13589996                             | n.d.                          | n.d.             | n.d.             | n.d.             | n.d.             | n.d.             |
| OT3          | tCTaTGCTGCCA-AATACCTGGG               | chr4:169715128-169715285                           | 0.95                          | 0.61             | 0.66             | 0.59             | 0.75             | 0.89             |
| OT4          | AaTcTaCTGCCA-AATACCTGGG               | chr8:76707015-76707213                             | 0.43                          | 0.39             | 0.45             | 0.41             | 0.48             | 0.47             |
| OT5          | AggTTG-TaCCACAATACCTTGG               | chr10:113490901-113491091                          | 0.51                          | 0.51             | 0.48             | 0.49             | 0.50             | 0.45             |
| OT6          | AgcTgGCTG-CACAATACCTTGG               | chr13:56216964-56217162                            | 0.55                          | 0.43             | 0.47             | 0.50             | 0.44             | 0.47             |
| OT7          | tCTgcGgTGCACAATACCTTGG                | chr12:98762684+98762848                            | 0.59                          | 0.61             | 0.56             | 0.75             | 0.52             | 0.71             |
| OT8          | AgagTGCaGcCACAAATACCTAGG              | chr9:28448755+28448930                             | 0.71                          | 0.73             | 0.67             | 0.64             | 0.72             | 0.68             |
| OT9          | ACaaTaCTGCCA-AATACCTAGG               | chr6:45052043-45052196                             | 0.71                          | 0.64             | 0.78             | 1.53             | 0.78             | 1.39             |
| OT10         | AtTTATGaaGCCACAATACCTGGG              | chr12:90309031+90309183                            | 0.67                          | 0.64             | 0.58             | 0.64             | 0.67             | 0.61             |
| OT11         | gtTTTGCTGCCACAAGACCTAGG               | chr6:46216177-46216276                             | 0.86                          | 0.64             | 0.46             | 0.43             | 0.59             | 0.51             |
| OT12         | tgTTTGTGCCA-AATACCTTGG                | chr7:136729999-136730159                           | n.d.                          | n.d.             | n.d.             | n.d.             | n.d.             | n.d.             |
| OT13         | ACTTcaCTGCCatAATACCTGGG               | chr2:195824652-195824785                           | 0.95                          | 0.78             | 1.11             | 0.89             | 0.81             | 0.84             |
| OT14         | ACTTTatATGaCAAAATACCTGGG              | chr9:117378303+117378482                           | 0.48                          | 0.54             | 0.39             | 0.54             | 0.61             | 0.47             |
| OT15         | tCTcTGCT-CCACAATACCTAGG               | chr3:25365542+25365698                             | 0.50                          | 0.44             | 0.47             | 0.52             | 0.45             | 0.55             |
| OT16         | tCTgTGCTGCC-CAATACCTTGG               | chr13:35884818+35884996                            | 0.72                          | 0.56             | 0.60             | 0.64             | 0.66             | 0.52             |
| OT17         | cCTcTtCT-CCACAATACCTAGG               | chr21:27362728-27362863                            | 0.80                          | 0.64             | 0.62             | 0.65             | 0.79             | 0.66             |
| OT18         | gCTTTCCTGCCAC-ATACCTGGG               | chr1:84363379+84363574                             | 0.55                          | 0.56             | 0.57             | 0.47             | 0.57             | 0.47             |
| OT19         | Ag-aTGCTGCaCAAAATACCTAGG              | chr18:3456273-3456460                              | 0.80                          | 0.54             | 0.61             | 0.62             | 0.54             | 0.55             |
| OT20         | AggTTcCTcCCACAATACCTGGG               | chr5:2961395+2961503                               | 0.70                          | 0.61             | 0.62             | 0.78             | 0.76             | 0.72             |
| OT21         | ACTTTGCaGCCACATACCTGGG                | chr17:61009795+61009954                            | 0.67                          | 0.72             | 0.83             | 0.84             | n.d.             | 1.22             |
| OT22         | A-TgTgATcCCACAATACCTGGG               | chr12:5650929-5651072                              | 0.54                          | 0.63             | 0.64             | 0.66             | 0.60             | 0.56             |
| OT23         | AtTcT-TCTGCCatAATACCTGGG              | chr8:108304580-108304753                           | 0.52                          | 0.56             | 0.65             | 1.10             | 0.48             | 0.61             |
| OT24         | cCTTTGCTcCCTCAATACCTAGG               | chr12:53011957-53012129                            | 0.70                          | 0.62             | 0.66             | 0.61             | 0.71             | 0.58             |
| OT25         | ACTTTGCaGCCACatgACCTGGG               | chr17:75547288+75547430                            | 0.56                          | 0.53             | 0.78             | 0.69             | 0.58             | 0.63             |
| OT26         | ACTTTGCTtCCAaAATAgCTGGG               | chr13:76387376-76387540                            | 0.69                          | 0.59             | 0.62             | 0.71             | 0.65             | 0.70             |
| OT27         | ACTTTGtTtCCACAATAgCTAGG               | chr13:77055944-77056107                            | 0.69                          | 0.61             | 0.74             | 1.11             | 0.54             | 0.65             |
| OT28         | ACTTTGCTGCTcACAATcCCTAGC              | chr13:81974451+81974555                            | 0.40                          | 0.49             | 0.52             | 0.39             | 0.51             | 0.51             |
| OT29         | ACTTTGtTGCCACAgACCTGGG                | chr10:73226422+73226613                            | 0.82                          | 0.68             | 0.99             | 0.73             | 0.73             | 0.88             |
| OT30         | ACaTTGTcACACAATACCTAGT                | chr11:1493022+1493184                              | 0.72                          | 0.71             | 0.64             | 0.65             | 0.69             | 0.64             |
| OT31         | AaTTTGCTGaCACAAGACCTTGG               | chr11:10677426+10677544                            | 0.50                          | 0.59             | 0.35             | 0.46             | 0.47             | 0.53             |
| OT32         | AgTTTGCTtCCACAATAcATAGG               | chr11:36513516+36513638                            | 0.59                          | 0.52             | 0.64             | 0.56             | 0.51             | 0.51             |
| OT33         | taTTTGCTGCCAgAATACCTTGG               | chr9:73068606-73068772                             | n.d.                          | n.d.             | n.d.             | n.d.             | n.d.             | n.d.             |
| OT34         | ACagTGCTGCCAAaAATACCTGGG              | chr15:78935858+78935995                            | 0.62                          | 0.64             | 0.77             | 0.61             | 0.52             | 0.63             |
| OT35         | ACTTgcCTGCCAcAATACCTGGG               | chrY:7231179+7231337                               | n.d.                          | n.d.             | n.d.             | n.d.             | n.d.             | n.d.             |
| OT36         | ACTTTGATGCCACAATAtCaTGG               | chr7:24649482-24649678                             | 0.64                          | 0.63             | 0.73             | 0.59             | 0.74             | 0.71             |
| OT37         | ACTTTtCTGcctcCaATACCTTGG              | chr3:70299910+70300073                             | 1.19                          | 0.88             | 1.00             | 0.76             | 1.06             | 0.86             |
| OT38         | ACTTTGCT-CCACAATgCCTGGG               | chr1:227324114-227324224                           | 0.50                          | 0.56             | 0.48             | 0.50             | 0.57             | 0.48             |
| OT39         | ACTTTGCTGCCACTgGTACCTGGG              | chr4:20389722-20389855                             | 0.62                          | 0.52             | 0.53             | 0.51             | 1.02             | 0.48             |
| OT40         | ACTcTGCT-CCACAATAtCTGGG               | chr4:101789193-101789357                           | 0.58                          | 0.64             | 0.56             | 0.69             | 0.64             | 0.66             |
| OT41         | tCTTTGCT-CCACAATAtCTGGG               | chr4:129408329+129408552                           | 0.74                          | 0.91             | 0.87             | 0.81             | 0.96             | 1.04             |
| OT42         | ACTTgGCTGCCACA-ACCTGGG                | chr18:23806155+23806259                            | n.d.                          | n.d.             | n.d.             | n.d.             | n.d.             | n.d.             |
| OT43         | ACTTTGCTG-CACcAATACCTGGC              | chr1:70805762-70805954                             | 0.57                          | 0.55             | 0.53             | 0.61             | 0.53             | 0.50             |
| OT44         | ACTTTGCTGCCAC-ATACCaTGT               | chr1:216169709+216169886                           | 0.51                          | 0.50             | 0.51             | 0.78             | 0.47             | 0.65             |
| OT45         | AC-TTGCTGCCAAaATgCCTTGG               | chr5:52278218-52278389                             | 0.66                          | 0.96             | 0.67             | 0.59             | 0.68             | 0.60             |
| OT46         | ACTTTGCTTGCCAAaAATACCTGGA             | chr5:59665136-59665275                             | 0.45                          | 0.50             | 0.47             | 1.43             | 0.51             | 0.51             |
| OT47         | ACTTTGCTGCC-CAAgAcTTGG                | chr19:49082325+49082466                            | 1.33                          | 1.35             | 1.33             | 1.48             | 1.41             | 1.42             |
| OT48         | ACaTTGCTG-CAGaAATACCTTGG              | chr12:50837080-50837226                            | 0.79                          | 0.77             | 0.67             | 0.72             | 0.76             | 0.75             |
| OT49         | AC-TgGCTGCCAcAATACCTGGG               | chr12:79983294-79983445                            | 1.22                          | 0.85             | 0.83             | 0.88             | 0.86             | 0.74             |
| OT50         | ACTTT-CTGCCACatgACCTGGG               | chr12:126286065-126286233                          | 0.65                          | 0.80             | 0.76             | 0.72             | 0.82             | 0.79             |
| OT51         | ACTTTGCTGatAC-ATACCTGGG               | chr16:50829626+50829775                            | 0.63                          | 0.71             | 0.84             | 0.78             | 0.69             | 0.64             |
| OT52         | ACTTTGgTGCCAAcAATACCTGGG              | chr16:67891109-67891286                            | n.d.                          | n.d.             | n.d.             | n.d.             | n.d.             | n.d.             |
| OT53         | ACcTTGCTG-CAGaAATACCTTGG              | chr22:41811842+41811995                            | 0.54                          | 0.53             | n.d.             | 0.48             | 0.69             | 0.46             |
| OT54         | ACTTCTGCTGcCACAaACCTTGG               | chr8:10512237+10512356                             | 0.56                          | 0.42             | 0.43             | 0.44             | 0.45             | 0.48             |
| OT55         | ACTTaGCTGCCAgAA-ACCTTGG               | chr8:130760741+130760888                           | 0.40                          | 0.41             | n.d.             | 0.45             | 0.43             | 0.56             |
| OT56         | AC-TTGCTGCCACAATAcTTTG                | chr14:93610395+93610551                            | 0.65                          | 0.48             | 0.70             | 0.55             | 0.49             | 0.58             |
| OT57         | AaTTTGCTGCCACAATt-CTAGG               | chr10:20442761-20442922                            | 0.51                          | 0.50             | 0.52             | 0.49             | 0.46             | 0.53             |
| OT58         | ACTTTGCT-CCACAATACcAGG                | chr11:58176050-58176199                            | 0.80                          | 0.76             | 0.67             | 0.78             | 0.81             | 0.92             |
| OT59         | tCTTTGCTGCCA-AtTACCTGGG               | chr15:29093086+29093232                            | 0.65                          | 0.58             | 0.59             | 0.55             | 0.63             | 0.62             |
| OT60         | ACTTTGCTG-CAaAATACCTTGC               | chr21:39088389+39088584                            | 0.45                          | 0.56             | n.d.             | 0.49             | 0.46             | 0.61             |
| OT61         | ACcTTGCTGCCA-AAcACCTTGG               | chr2:160662807-160662949                           | 0.72                          | 0.60             | 0.51             | 0.66             | 0.52             | 0.52             |

|      |                          |                          |      |      |      |      |      |      |
|------|--------------------------|--------------------------|------|------|------|------|------|------|
| OT62 | ACaTTGCTGgCACAAT-CCTGGG  | chr2:213255950+213256111 | 0.65 | 0.57 | 0.52 | 0.87 | 0.54 | 0.55 |
| OT63 | ACTTTGgTtCC-CAATACCTGG   | chr2:196036434-196036580 | 0.68 | 0.62 | 0.73 | 0.56 | 0.60 | 0.72 |
| OT64 | ACTcT-CTGCCACAATACCTAGA  | chrY:13436340-13436535   | n.d. | n.d. | n.d. | n.d. | n.d. | n.d. |
| OT65 | ACTTTtCT-CCACAAtTACCTGG  | chr6:39041870+39042064   | 0.56 | 0.75 | 0.50 | 0.59 | 0.82 | 0.73 |
| OT66 | ACcTTGCTG-CAgAATACCTGG   | chr6:27785457+27785633   | 0.58 | 0.62 | 0.59 | n.d. | 0.67 | 0.65 |
| OT67 | AgTTTGTGCCACAA-ACCaAGG   | chr6:9683015-9683167     | 0.47 | 0.57 | 0.67 | 0.60 | 0.57 | n.d. |
| OT68 | ACTTTGg-GCCAgAATACCTAGG  | chrX:13570761-13570950   | 0.51 | 0.49 | 1.25 | 0.64 | 0.56 | 0.55 |
| OT69 | ACcTTGtTGCCA-AATACCTGG   | chrX:48090226-48090407   | 0.62 | 0.64 | 0.71 | 0.81 | 0.65 | 0.75 |
| OT70 | AtTTTGCTGCCACAA-ACCaAGG  | chrX:106057761-106057923 | n.d. | n.d. | n.d. | n.d. | n.d. | n.d. |
| OT71 | ACTgTGCTGCaACAA-ACCTGG   | chrX:143235479-143235619 | n.d. | n.d. | n.d. | n.d. | n.d. | n.d. |
| OT72 | ACTTTGCT-CCACAATgCCTGGT  | chr7:155177942+155178085 | 0.60 | 0.56 | 0.62 | 0.58 | 0.57 | 0.55 |
| OT73 | AC-TTgATGCCACAATACtTGGG  | chr3:72392649-72392845   | 0.44 | 0.56 | 0.38 | 0.45 | 0.48 | 0.43 |
| OT74 | ACTcTGCTGCCACAgT-CCTAGG  | chr3:133006042+133006198 | 0.48 | 0.40 | 0.44 | 0.51 | 0.31 | n.d. |
| OT75 | ACTcTGaTGCCACAGATACCTGGG | chr3:171524879+171525051 | 0.58 | 0.79 | 0.51 | 0.60 | 0.45 | 0.72 |
| OT76 | tCTTTGCT-CCACAATAtCTGGG  | chr3:169677452-169677627 | 0.48 | 0.54 | 0.60 | 0.58 | 0.59 | 0.51 |
| OT77 | tCTTTGCTGCCAC--TACCTGG   | chr1:184534886-184535019 | 0.91 | 0.86 | 0.99 | 0.99 | 0.69 | 0.80 |
| OT78 | ACTTTGCTGC--CAATACtTTGG  | chr15:40233992+40234119  | n.d. | n.d. | n.d. | n.d. | n.d. | n.d. |
| OT79 | ACcTTGCTGCCAC--TACCTGGG  | chr2:98883002-98883164   | 0.72 | 0.59 | 0.62 | 0.74 | 0.65 | 0.63 |

<sup>a</sup>The *PAH* on-target sequence and top ONE-seq-nominated and in-silico-nominated candidate off-target sequences with mismatched positions and bulges indicated by lower case letters and dashes.

<sup>b</sup>Coordinates in the GRCh38/hg38 assembly of the human genome; “+” and “-” indicate forward or reverse orientation of protospacer/PAM sequence.

<sup>c</sup>n.d. = PCR was unsuccessful for the genomic site.
